22 **Abstract:** Methane emitted by insects is considered to be an important source of  
23 atmospheric methane. Here we report the stimulation of methane emission in *Periplaneta*  
24 *americana*, an insect species with abundant methanogens, by neonicotinoids, insecticides  
25 widely used to control insect pests. The application of cycloxyprid (CYC) and  
26 imidacloprid (IMI) caused foregut expansion in *P. americana*, and increased the methane  
27 production and emission. Antibiotics could mostly eliminate the stimulatory effects. In *P.*  
28 *americana* gut, hydrogen levels increased and pH values decreased, which could be  
29 significantly explained by the gut bacterium community change. The proportion of  
30 several bacterium genera increased in guts following CYC treatment, and four genera  
31 from five with increased proportions could generate hydrogen at anaerobic conditions.  
32 Hydrogen is a central intermediate in methanogenesis. Gut methanogens could use the  
33 increased hydrogen to produce more methane, especially at acidic conditions. Following  
34 neonicotinoid applications, all increased methanogens in both foregut and hindgut used  
35 hydrogen as electron donor to produce methane. Besides, the up-regulation of *mcrA*,  
36 encoding the enzyme that catalyzes the final step of methanogenesis, suggested an  
37 enhanced methane production ability in present methanogens. In the termite *Coptotermes*  
38 *chaohuensis*, another methanogen-abundant insect species, hydrogen levels in gut and  
39 methane emission significantly increased after neonicotinoid treatment, which was  
40 similar to the results in *P. americana*. In summary, neonicotinoids changed bacterium  
41 community in *P. americana* gut to generate more hydrogen, which then stimulate gut  
42 methanogens to produce and emit more methane. The finding raised a new concern over  
43 neonicotinoid applications, and might be a potential environmental risk associated with  
44 global warming.

45 **Introduction**

46 Neonicotinoids are extensively used to control insect pests important in both crop  
47 protection and animal health. Because of their high efficacy, neonicotinoids have become  
48 one of the main classes of insecticides for a range of insect species since the early 1990s.  
49 By 2008, neonicotinoids had accounted for 24% of the global insecticide market (Peter et  
50 al., 2010) and the market share had increased to more than 25% in 2014 (Bass et al.,  
51 2015). However, environmental concerns on neonicotinoids have become increasingly  
52 prevalent in recent years, such as the accumulation in soil, leaching into waterways,  
53 systemic persistence in crops and plants, and substantial impact on bees and other  
54 pollinators (Godfray et al., 2015; Goulson and Kleijn, 2013). For example, neonicotinoids  
55 were thought as an important factor for the bee colony collapse disorder due to their  
56 lethal and sublethal effects, with reduced learning, foraging, and homing ability (Henry et  
57 al., 2012; Stanley et al., 2016), as well as reduced colony growth and production of new  
58 queens at the population level (Godfray et al., 2015; Whitehorn et al., 2012). Here, we  
59 first reported a new finding on neonicotinoid application stimulating methane production  
60 and emission in *Periplaneta americana* (American cockroach), an insect species with  
61 abundant methanogens. Because methane emitted by insects is considered to be an  
62 important source of atmospheric methane (Yvon-Durocher et al., 2014), the stimulation  
63 of methane emission in methanogen-abundant insects by neonicotinoids would be a  
64 concern for the environmental risk associated with global warming.

65 **Results**

66 **Observation of morphological changes of *Periplaneta americana* and determination**  
67 **of H<sub>2</sub> pressure and pH value in guts**

68 Cycloxaprid (CYC), a new neonicotinoid recently developed and registered in China,  
69 shows high insecticidal activity against a range of insect pests (Casida, 2018; Sparks and  
70 Nauen, 2015; Zhang et al., 2019). When treated with CYC, *P. americana* was stretched  
71 and thickened (Fig. 1A), and the foregut was bloated enormously (Fig. 1B). The  
72 morphological changes were both time-dependent (Fig. 1C, Fig. S1A) and  
73 concentration-dependent (Fig. 1D, Fig. S1B). The morphological changes occurred  
74 rapidly after CYC treatment, developed sharply over time and reached the peak at 30 h  
75 with an increase of 30% in the body length and 35% in thickness (Fig. S1). Body  
76 extension in *P. americana* was also observed in the imidacloprid (IMI) treatment (Fig.  
77 1E), which was also time-dependent and concentration-dependent (Fig. S2).

78 H<sub>2</sub> pressure and pH value were determined in CYC treated *P. americana* gut and  
79 compared to that of untreated control. In the untreated *P. americana* gut, H<sub>2</sub> pressure was  
80 close to 0 (Fig. 1F). The greatest increase of H<sub>2</sub> pressure was 51 kPa in the midgut center  
81 following CYC treatment. However, the increase ratios in foreguts (14.8-85.6 times) were  
82 much bigger than that in midguts (6.8-8.4 times) and hindguts (2.2-4.7 times) when  
83 compared to CK (Fig. 1F). The pH values in CYC treated *P. americana* midguts and  
84 hindguts significantly decreased when compared to untreated control (Fig. 1G). The pH  
85 data were not successfully determined in foreguts of CYC-treated insects, due to the  
86 difficulty in positioning micro-sensor tip to the measure site in the bloated gut (Fig. 1G).  
87 The bloated gut burst when the pH micro-sensor tip penetrated the up site and moved to

88 the bottom site where the pH measure content was.

89

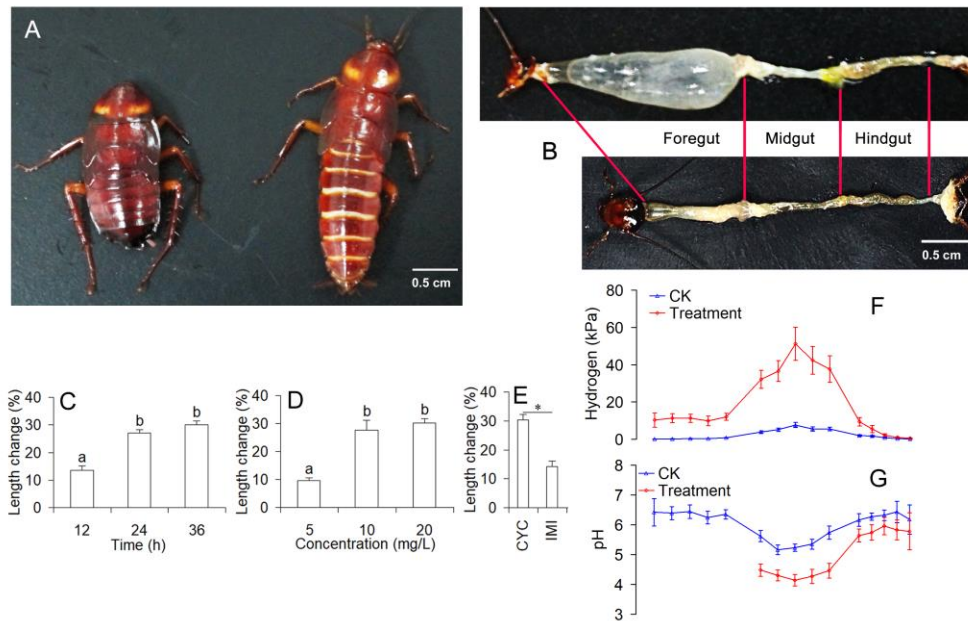

90

91 **Figure 1. Morphological changes in *Periplaneta americana* following neonicotinoid treatments and**  
92 **changes in gut H<sub>2</sub> pressure and pH value.** (A) The 9th instar nymphs of *P. americana* following CYC  
93 treatment (right) and the untreated control (left). (B) The dissected guts from CYC-treated (up) and  
94 untreated (bottom) *P. americana*. (C) Changes in the body length at different time points after CYC  
95 treatment at LC<sub>20</sub> concentration. (D) Body length changes at 36 h after the CYC treatment at different  
96 concentrations. In C and D, different letters indicated significant differences at 0.05 level. (E) Body length  
97 changes at 36 h following CYC and IMI treatments at LC<sub>20</sub> concentrations. \*, significant difference at 0.05  
98 level. (F) H<sub>2</sub> pressure comparison between CK and CYC treatment. (G) pH value comparison between CK  
99 and CYC treatment. In F and G, the abscissa of each test site in insect gut corresponded to that of CK gut in  
100 B. Because pH micro-sensor tip could not position to the measure site in the bloated foregut, pH data of  
101 foregut were not obtained in CYC treated insects (G). In C-G, data are mean±SEM from at least five  
102 repetitions.

103

#### 104 **Stimulation of methane emission from *P. americana* by neonicotinoids**

105 The gas in bloated foreguts of *P. americana* was collected and determined by gas  
106 chromatography. A single peak was observed at the retention time of 1.873 min (Fig. 2A),  
107 which was almost identical to that of methane standard (Fig. S3A). Then methane

108 emission was determined and quantified. CYC and IMI at  $LC_{20}$  stimulated methane  
109 emission in a time-dependent manner, and the emission rate reached the peak (37.3  
110 ng/insect/h) at 30 h for CYC and (23.3 ng/insect/h) at 33 h for IMI, which was 17.4 and  
111 6.33 times as much as the untreated control, respectively (Fig. 2B).  
112 Concentration-dependent stimulation of the methane emission was observed for both  
113 CYC and IMI (Fig. 2C). The antibiotics chloramphenicol (Cp) and N-[2-(Nitrooxy)  
114 ethyl]-3-pyridinecarboxamide (NPD) could mostly eliminate the stimulatory effects on  
115 methane emission by insecticide treatments (Fig. 2D).

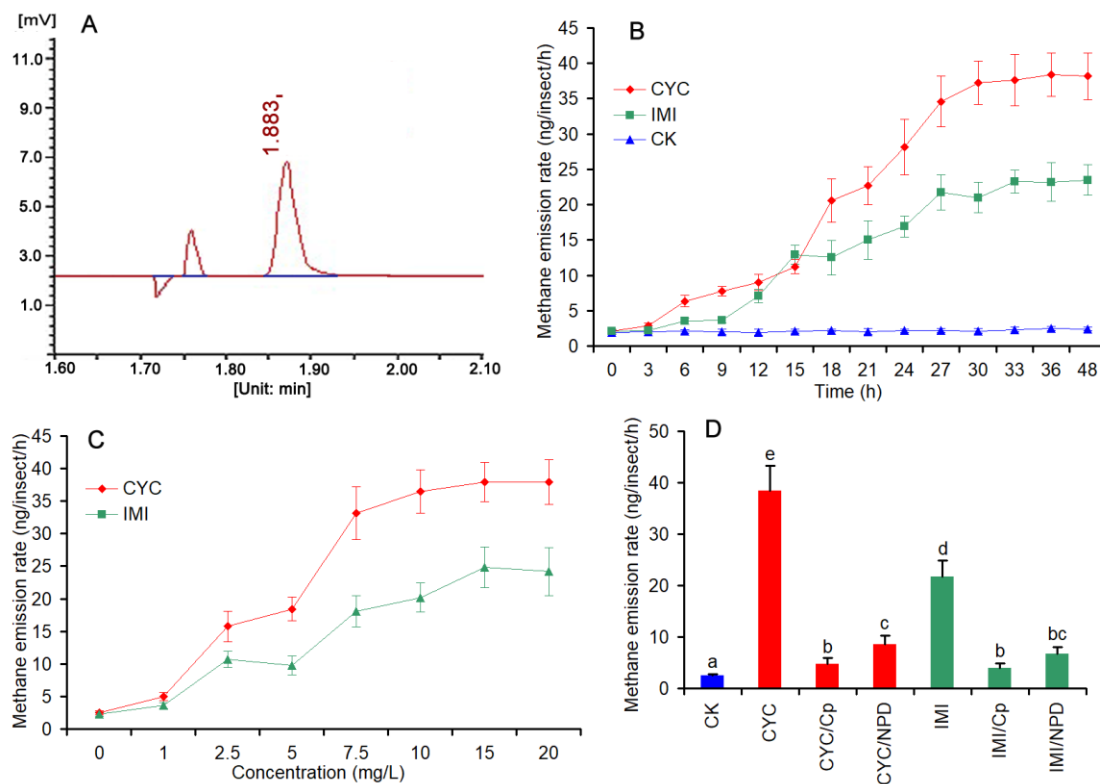

116

117 **Figure 2. Identification and quantitative determination of methane from *P. americana* following**  
118 **neonicotinoid applications.** (A) The gas chromatography identification of methane in the bloated foreguts  
119 of *P. americana* following CYC treatment. (B) Methane emission from *P. americana* at different time  
120 points following CYC and IMI application at  $LC_{20}$  and untreated control. (C) Methane emission from *P.*  
121 *americana* at 36 h following CYC and IMI treatment with different concentrations. (D) Effects of  
122 antibiotics on methane emission from *P. americana* following the treatment by CYC and IMI at  $LC_{20}$   
123 concentration. To calculate the emission quantity of methane, the relationship line between chromatography

124 peak area and methane quantity was set up using standard methane (Fig. S3B). In B, C and D, data are  
125 mean±SEM from at least five repetitions.

126

### 127 **Stimulation of methane emission from *Coptotermes chaohuensis* by neonicotinoids**

128 The methane emission was also stimulated by neonicotinoids in the wingless  
129 workers of *C. chaohuensis* (Figure 3A), although neither morphological change nor gut  
130 bloat was observed (Fig. 3B, Fig. S4). At  $LC_{20}$  concentration, CYC had higher  
131 stimulatory effects on methane emission than that of IMI, which was similar to that in *P.*  
132 *americana*.  $H_2$  pressure was also determined in CYC treated *C. chaohuensis* gut. Similar  
133 to results of *P. americana*,  $H_2$  pressure significantly increased in CYC-treated *C.*  
134 *chaohuensis* gut when compared to untreated control (Fig. 3C). However, the increase in  
135  $H_2$  pressure was negligible at the end of hindgut.

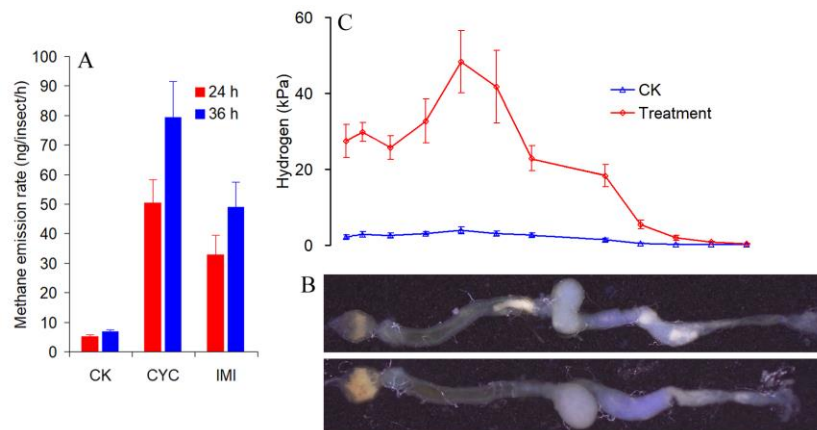

136

137 **Figure 3. Determination of hydrogen pressure in gut and methane emission of *C. chaohuensis*.** (A)  
138 Methane emission from *C. chaohuensis* at 24 h and 36 h after CYC and IMI application at  $LC_{20}$   
139 concentration and untreated control. (B) The dissected guts from CYC-treated (up) and untreated (bottom)  
140 *C. chaohuensis*. (C) Gut  $H_2$  pressure comparison between CK and CYC treatment. In C, the abscissa of  
141 each test site in insect gut corresponded to that of gut present in B. In A and C, data are mean±SEM from at  
142 least five repetitions.

143

144

145 **Effects of neonicotinoids on methane emission from soils and sheep rumen fluids**

146 Due to fail in culturing methanogens from *P. americana*, it was impossible for us to  
147 determine whether *P. americana* gut methanogens was in direct response to neonicotinoid  
148 treatment. We instead collected methanogens from the rumen fluid of the Chinese Hu  
149 sheep for insecticide treatments<sup>15</sup>. CYC treatment on rumen fluids neither changed the  
150 total amount of gas emission (Fig. 4A) nor increased methane emission (Fig. 4B). CYC at  
151 the concentration up to 500 mg/L reduced methane emission was possibly due to the  
152 inhibition on methanogen population. The results showed that neonicotinoids did not  
153 stimulate methane production in the collected methanogens from rumen animals.  
154 However, whether neonicotinoids change methane production in the rumina *in vivo* needs  
155 further studies.

156 Neonicotinoids can persist and accumulate in soil, and rice fields are major  
157 anthropogenic sources of methane emission<sup>3, 16</sup>. If neonicotinoids stimulate methane  
158 production in methanogens in rice field soil, it may have an impact on the environment.  
159 Rice field soil was collected and treated with CYC and IMI<sup>17</sup>. Fortunately, no significant  
160 change in the methane production and emission from the rice field soil with methanogens  
161 was observed when the methanogens were directly treated by either cycloxaprid or  
162 imidacloprid (Fig. 4C, 4D).

163



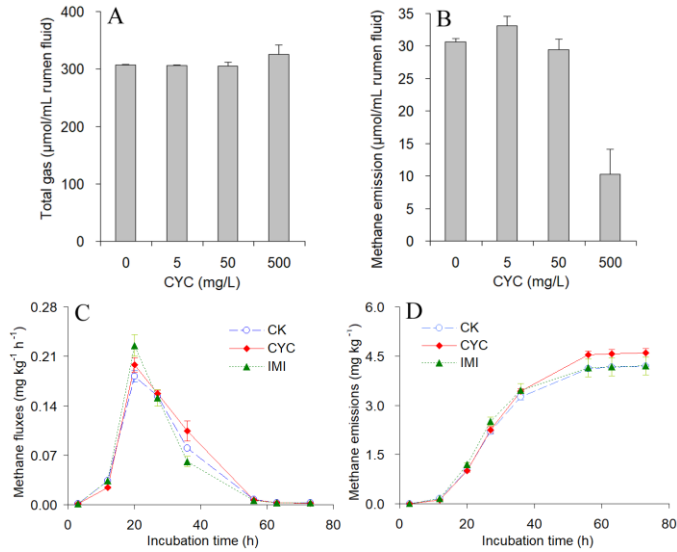

164

165 **Figure 4. Effects of neonicotinoids on methane emission from rumen fluids of the Chinese Hu sheep**  
166 **and rice field soils.** Total gas (A) and methane (B) emission mounts were determined in sheep rumen fluids  
167 treated by different concentrations of CYC. Methane emission rate (C) and mount (D) were determined in  
168 rice field soils with addition of CYC and IMI at a final concentration of 500 mg/kg soil. Data are  
169 mean±SEM from at least three repetitions.

170

#### 171 **Analysis of the bacterium community in *P. americana* guts**

172 The diversity changes of bacteria were estimated using 16S rRNA sequencing in three  
173 parts of *P. americana* guts, the foregut, midgut, and hindgut, and compared between  
174 CYC-treated individuals and the untreated control (Fig. S5). In three gut parts, CYC  
175 treatment caused significant changes in some bacterium genera (Fig. 5). For examples,  
176 *Shimwellia* increased from 17.56% to 45.93% in foreguts (Fig. 5A), *Lactococcus* from  
177 0.16% to 10.68%, *Pediococcus* from 0.81% to 8.75% and *Shimwellia* from 0.02% to  
178 7.03% in midguts (Fig. 5B), and *Desulfovibrio* from 5.90% to 12.02% in hindguts (Fig.  
179 5C). Similarly, some bacterium genera in guts decreased after CYC treatment, such as the  
180 genus *Arthromitus* (*g\_Candidatus\_Arthromitus*) from 34.04% to 2.61% in hindguts (Fig.  
181 5C).

182

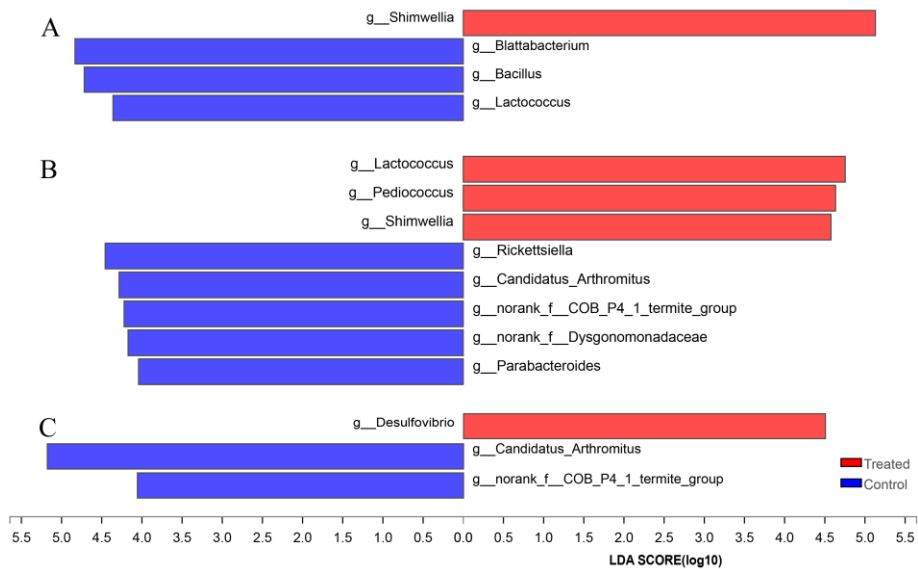

183

184 **Figure 5. Comparison of bacteria community in three parts of *P. americana* guts between CYC**  
185 **treatment and untreated control.** The most different taxa in abundance in bacteria between groups were  
186 determined by LDA effect size (LEfSe) analysis, lowercase letters before taxon name mean different  
187 assigned taxa, i.e. g for genus and f for family. The threshold of LDA score is 4. (A) Foregut. (B) Midgut.  
188 (C) Hindgut.

189

### 190 **Analysis of the archaea and methanogen community in *P. americana* guts**

191 The archaea and methanogen communities were estimated and compared between CYC  
192 treatment and untreated control (Fig. S6). Although several trials were performed for  
193 midgut samples from both treatments and controls, we could not get enough data to  
194 estimate archaea and methanogen communities in this gut part.

195 In *P. americana* foregut, CYC treatment increased the proportion of the identified  
196 methanogens in archaea community when compared to that of untreated control, mainly  
197 reflecting in the significant increase of *Methanocorpusculum* (Fig. 6A), the obvious but  
198 not significant increase in *Methanobrevibacter*, unclassified\_f\_Methanobacteriaceae, and

199 the decrease in unclassified\_k\_norank\_d\_Archaea (Fig. S6A). The methanogen  
200 community of foregut did not significantly change (Fig. S6B), although *Methanobacteria*  
201 and *Methanobacteriales* (also belonging to class of Methanobacteria) had significant  
202 changes (Fig. 6B), however, with negligible proportions in both CYC treatment and  
203 untreated control (Fig. S6B).

204 In hindguts, methanogens almost occupied 100% of the archaea community (Fig.  
205 S6C). The relevant abundance of two taxa, genus of *Methanospirillum* and family of  
206 *Methanobacteriaceae* (no genus classification), significantly increased (Fig. 6C). The  
207 methanogen community in hindguts had various changes following CYC treatment (Fig.  
208 S6D), with significant increases in *Methanomassiliicoccaceae* and *Methanosarcinaceae*,  
209 and decrease in *Methanomassiliicoccales* (Fig. 6D).

210

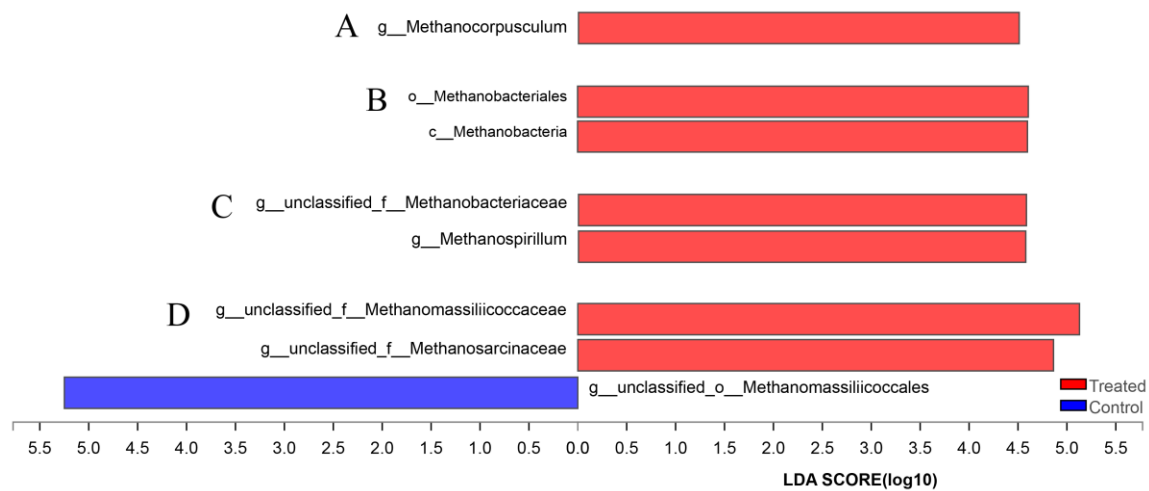

211

212 **Figure 6. Comparison of archaea and methanogen communities in *P. americana* foreguts and**  
213 **hindguts between CYC treatment and untreated control.** The most different taxa in abundance in  
214 archaea and methanogens between groups were determined by LDA effect size (LEfSe) analysis, lowercase  
215 letters before taxon name mean different assigned taxa, i.e. g for genus, f for family, o for order and c for  
216 class. The threshold of LDA score is 4. (A) Archaea in foregut. (B) Methanogens in foregut. (C) Archaea in  
217 hindgut. (D) Methanogens in hindgut.

## 218 **Quantitative analysis of *mcrA* in insect guts following neonicotinoid treatments**

219 The transcript level of *mcrA* was quantified in *P. americana* guts and compared between  
220 neonicotinoid treatments and untreated controls. The *mcrA* transcript levels remained  
221 stable in wild *P. americana* guts, but increased in insecticide treatments in a  
222 time-dependent manner and reached the peak at 36 h (Fig. 7A). CYC and IMI treatments  
223 increase *mcrA* transcript levels in guts to 8.01- and 3.97-fold than that of untreated  
224 control at 36 h, respectively. The *mcrA* level increase caused by insecticide treatments  
225 occurred in the hindgut and foregut, but not in the midgut (Fig. 7B). CYC treatment  
226 resulted in an 8.97- and 6.42-fold increase in *mcrA* levels in hindguts and foreguts, and  
227 the fold change for IMI treatment were 3.70 and 3.78, respectively.

228

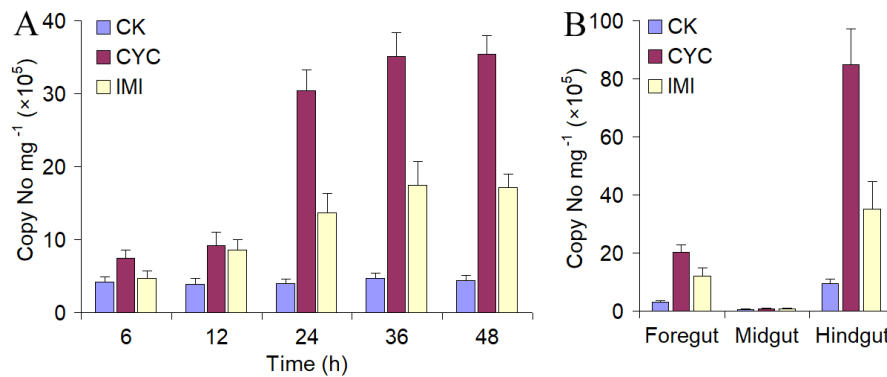

229

230 **Figure 7. Determination of *mcrA* abundance in *P. americana* guts following CYC and IMI treatments.**

231 (A) Changes of *mcrA* abundance in *P. americana* guts at different time points after insecticide treatments.

232 (B) Changes of *mcrA* abundance in different gut parts at 36 h after insecticide treatments. Data are

233 mean±SEM from at least five repetitions.

234

## 235 **Discussion**

236 Insecticides help us prevent crop lose from insect pests, but also bring a dozens of

237 environmental concerns. Neonicotinoids accounted for over one-quarter of the global

238 insecticide market (Bass et al., 2015). However, neonicotinoids were also considered a  
239 main factor for the bee colony collapse disorder (Henry et al., 2012; Whitehorn et al.,  
240 2012). The methanogen-abundant insects, such as termites, cockroaches, and scarab  
241 beetles, emit methane produced by their gut methanogens. Methane emitted by insects is  
242 an important source of atmospheric methane (Brune, 2010). Take termites as a  
243 representative example, they contribute approximately 3% to global methane emission  
244 (Sanderson, 1996). Although these insects are not target pests of neonicotinoids, they are  
245 often exposed to neonicotinoids due to neonicotinoid accumulation in soil, leaching into  
246 waterways and systemic persistence in plants (Goulson and Kleijn, 2013). Neonicotinoids  
247 of the exposure concentrations may be sublethal, but still have the possibility to cause  
248 some effects on these insect species, as their sublethal effects on bees (Henry et al., 2012).  
249 Here we reported a finding that neonicotinoids, at their sublethal concentrations,  
250 stimulated methane emission in the American cockroach, *P. americana*, a  
251 methanogen-abundant insect species. The stimulation on methane emission by  
252 neonicotinoids was also observed in the termite *Coptotermes chaohuensis*, another  
253 methanogen-abundant insect species. The stimulation of methane production and  
254 emission was not a general methanogen response to neonicotinoid application, because  
255 neonicotinoids treatments did not cause any changes in methane emission in rumen fluids  
256 of the Chinese Hu sheep and rice field soils with abundant methanogens. The results  
257 revealed that the stimulation of methane production in *P. americana* gut through an  
258 indirect way.

259 Two neonicotinoids, CYC and IMI at  $LC_{20}$  concentration, changed the bacterium  
260 community in *P. americana* guts directly or indirectly, and some of the increased

261 bacterium genera could produce more hydrogen and change the pH condition in gut.  
262 *Shimwellia*, a genus with significantly increased proportion in CYC-treated *P. americana*  
263 foreguts and midguts, belongs to the family *Enterobacteriaceae* which produces typical  
264 acidic fermentation products such as hydrogen and lactate (Bauer et al., 2015).  
265 *Lactococcus*, a genus produces hydrogen at anaerobic conditions (Pandey et al., 2019),  
266 had increased proportion in CYC-treated midguts, but was with lower proportion in the  
267 treated foreguts. *Desulfovibrio*, a genus with significantly increased proportion in  
268 CYC-treated hindguts, produced hydrogen, and they also have the ability to live in stable  
269 syntrophic associations with H<sub>2</sub>-scavenging methanogenic partners (Baffert et al., 2019).  
270 *Pediococcus*, with increased percentage in CYC-treated midguts, could lead to pH  
271 decrease by producing organic acids, although they did not produce hydrogen (Banwo et  
272 al., 2013).

273 Hydrogen is a central intermediate in methanogenesis and the most important electron  
274 donor for hydrogenotrophic methanogenesis (Brune, 2010). In CYC-treated *P. americana*  
275 gut, methanogens had two ways of taking full advantage of increased hydrogen, changing  
276 methanogen community and increasing methanogenesis ability in the present  
277 methanogens. In the hindguts of *P. americana*, which do not accumulate hydrogen,  
278 methanogenesis is severely hydrogen-limited (Lemke et al., 2001). Several methanogen  
279 genera had higher proportions in CYC-treated *P. americana* guts (foreguts and hindguts)  
280 than that in untreated control, and all these methanogen genera belongs to  
281 hydrogenotrophic methanogenesis using hydrogen as the electron donor to generate  
282 methane (Kroeninger et al., 2019; Thauer et al., 2008). Methanogens are phylogenetically  
283 diverse, but the enzyme *mcrA* is considered typical of all known methanogens (Friedrich,

284 2005). In some samples, such as the anaerobic digesters treating sludge and wastewater  
285 samples, the *mcrA* gene could be recognized as a biomarker for methane yield (Wilkins et  
286 al., 2015). In the present study, *mcrA* was significantly up-regulated by both CYC and  
287 IMI in *P. americana* guts (foreguts and hindguts), which indicated that methanogen  
288 community in CYC-treated guts had a higher ability in methanogenesis than that of  
289 untreated control.

290 Methanogens are generally considered to be restricted in the enlarged hindgut  
291 compartment fueled by hydrogen (Brune, 2010). The accumulated hydrogen in guts is  
292 toxic to insects, and insects from non-methane-emitting taxa emit substantial amounts of  
293 hydrogen and some individuals from methane-emitting taxa that fail to produce methane  
294 often emit hydrogen instead (Hackstein and Stumm, 1994; Schmitt-Wagner and Brune,  
295 1999; Sugimoto et al., 1998). Most methanogens have not been cultured yet, and their  
296 diversity could only be deduced from the analysis of their 16S rRNA genes (Hackstein  
297 and van Alen, 2018). By 16S rRNA sequencing, the diverse methanogens were estimated  
298 in both *P. americana* foreguts and hindguts, not restricted in hindgut compartment. *P.*  
299 *americana* does not have an enlarged hindgut compartment, and its foregut has a  
300 comparable size to the hindgut. This is the main reason that this gut part was denoted as  
301 foregut, but not crop as in most methanogen-abundant insects (Brune, 2010). *P.*  
302 *americana* foregut and hindgut have similar hydrogen pressure, which is much lower  
303 than that of its midgut. The distinct gut structure of *P. americana* make it possible to  
304 contain methanogens in the foregut. Successful detection and quantification of *mcrA* gene  
305 in foreguts also provided indirect evidences for the presence of methanogens in *P.*  
306 *americana* foreguts (Friedrich, 2005). In future, we will try to find out other direct

307 evidence to confirm the presence of methanogens in *P. americana* foreguts.

308 An interesting finding in this study was the bloated foregut in *P. americana* after  
309 neonicotinoid treatment. Methane was detected in the bloated foregut gas, which  
310 provided a direct clue for us to test methane production and emission from *P. americana*  
311 following insecticide applications. A possible explanation for the bloated foregut is that  
312 methane was massively produced by foregut methanogens using hydrogen in foregut  
313 itself and from midgut. As results shown, the hydrogen pressure in neonicotinoid treated  
314 midgut and foregut was significantly higher than that in untreated control. The *P.*  
315 *americana* foregut gas could not be emitted from its esophagus and cross midgut, and  
316 then caused the foregut bloat. *P. americana* hindgut does not accumulate hydrogen as  
317 well as methane (Lemke et al., 2001), so the bloat appearance was not observed in its  
318 hindgut. In *P. americana* hindgut, methane was generated by methanogens using  
319 hydrogen and emitted by its anus.

320 At anaerobic conditions in insect guts, the accumulated hydrogen inhibits the  
321 degradation of organic matters by microbes, due to the difficulty in cyclical utilization of  
322 NAD (nicotinamide adenine dinucleotide) and the abnormality in oxidation-reduction  
323 reaction. So the accumulated hydrogen in guts affected adversely on insects, although the  
324 effects may be sublethal and without direct toxicity such as quick death (Hackstein and  
325 Stumm, 1994). In methanogen-abundant insects, methanogens effectively utilize the  
326 generated hydrogen, which is an important mechanism to detoxify insects from  
327 accumulated hydrogen in guts. If neonicotinoids also stimulate hydrogen generation in  
328 insects without methanogens in guts, such as in bees, is it possible that the high hydrogen  
329 concentration leads to sublethal effects on insect physiology and population growth?



330 **Materials and methods**

331 **Insects and Chemicals**

332 *Periplaneta americana* was purchased from Feitian Medicinal Animal Co. Ltd. (Danyang,  
333 China). *Coptotermes chaohuensis* was provided by Nanjing Termite Control Institute  
334 (Nanjing, China). Cycloxaprid (CYC) was provided by East China University of Science  
335 and Technology (Shanghai, China). Imidacloprid (IMI) was purchased from  
336 Sigma-Aldrich (St. Louis, MO). Chloramphenicol (Cp) was purchased from ABC One  
337 (Shanghai, China). N-[2-(Nitrooxy) ethyl]-3-pyridinecarboxamide (NPD) was obtained  
338 from Nipro Pharma Corporation Kagamiishi Plant (Kagamiishi, Japan).

339

340 **Bioassay**

341 The bioassays were performed with the oral application method. Insecticides were  
342 dissolved in acetone and then diluted to required concentrations with distilled water. Ten  
343 microliter insecticide solution was orally applied to the 9th instar nymphs of *P. americana*  
344 with a 10  $\mu$ L pipette. *C. chaohuensis* (wingless worker) were fed with insecticide  
345 solutions soaked in a piece of filter paper for 12 h. Aqueous acetone solution equivalent to  
346 the maximum volume in all insecticide solutions was used as the control. The treated  
347 insects were maintained in the greenhouse and the mortality was recorded at 48 h. For the  
348 antibiotic treatment, Cp and NPD were applied at the concentration of 5 mg/L orally  
349 applied to *P. americana*. Insecticides were then applied at 72 h after the antibiotic  
350 treatments.

351

352 **Recording changes in *P. americana* bodies and guts**

353 The lethal concentration 20% ( $LC_{20}$ ) of each insecticide on *P. americana* was calculated  
354 based on the bioassay results. Insecticides at the concentration of  $LC_{20}$  were applied in  
355 further experiments. The insect body length and thickness were then measured with a  
356 vernier caliper at a serial of time points. The intact guts were dissected and photographed  
357 at 24 h after the insecticide treatment. At least fifteen insects were measured with.

358

### 359 **Detection and quantitative analysis of methane**

360 To detect gas in the foregut of *P. Americana* after neonicotinoid applications, five intact  
361 foreguts were dissected and deposited in a 5 mL airtight vial. The vial was fully filled with  
362 pure nitrogen, and then sealed with a rubber plug. The foregut gas was released with a 2.5  
363 mL gas-tight syringe and fully mixed. Then 1 mL gas was collected and rapidly injected  
364 into the chromatographic system and recorded on Agilent 6820 with chromatographic  
365 column Agilent HP-AL/S (30m×0.530mm×15nm). Injection conditions were at the  
366 column temperature 80 °C, vaporization chamber temperature 100 °C, hydrogen ion  
367 flame detector (FID), detection temperature 230 °C, carrier gas nitrogen, column flow  
368 rate 2.9 mL/min, and split ratio 10:1.

369 To collect the methane emitted by insects, the test insects were incubated in a 500 mL  
370 glass bottle. The bottle had a metal lid with an opening (10 mm diameter) plugged with a  
371 butadiene rubber septum. Thirty 9th instar nymphs of *P. Americana* or 150 wingless  
372 workers of *C. chaohuensis* were used in each bottle. The gas samples (2.5 ml) were  
373 aspirated by a syringe through the septum for the methane concentration determination at  
374 different time points following the incubation. Using the methane standard, the calculation  
375 equation between the methane mass and areas in chromatographic recording was

376 determined as  $y=0.0014x+1.6663$ , in which  $y$  is the methane quantity (ng) and  $x$  is the  
377 peak area ( $\mu\text{V}\times\text{s}$ ).

378

### 379 **Determination of H<sub>2</sub> pressure and pH values in *P. americana* gut**

380 The intestinal H<sub>2</sub> pressure was measured according to Hydrogen Sensor User Manual  
381 using the standard glass micro-sensor H2-50 (outside tip diameter 40  $\mu\text{m}$ , Unisense,  
382 Aarhus, Denmark). The micro-sensor was fixed on a micromanipulator and calibrated in  
383 Ringer's solution containing a 95 % N<sub>2</sub> and 5 % H<sub>2</sub>. The pH value was determined  
384 according to pH and Reference Electrode Manual using the standard glass micro-sensor  
385 pH-50 (outside tip diameter 50  $\mu\text{m}$ , Unisense, Aarhus, Denmark). The pH microelectrode  
386 was calibrated with the commercial pH standard solutions of pH 3.0, 5.0, 7.0 and 9.0. The  
387 dissected *P. americana* and *C. chaohuensis* guts were placed in a small PVC chamber and  
388 was irrigated with air-saturated Ringer solution at pH 7.0. The microelectrode was moved  
389 with a minimum step increment of 50  $\mu\text{m}$  and the tip was positioned with a horizontally  
390 mounted stereomicroscope. All measurements were carried out at 25 °C. For each part of  
391 the gut (foregut, midgut, and hindgut), five sites were selected for the measurement. The  
392 test at each site was repeated for at least 5 times.

393

### 394 **Determination of effects of neonicotinoids on rumen fluids of Chinese Hu sheep**

395 Three rumen-fistulated Chinese Hu sheep were used as inoculant donor animals. The  
396 experiment was performed according to the procedure reported by Martínez-Fernández et  
397 al. (Martínez-Fernández et al., 2014). Alfalfa was milled to 1 mm long before being  
398 weighed into 100 mL serum bottles. Ruminal contents were obtained immediately before

399 the morning feeding from the three sheep, pooled, and strained through 4 layers of  
400 cheesecloth into an insulated flask under anaerobic conditions. The filtered rumen fluid  
401 was mixed with the buffer solution at a ratio of 1:3 (v:v) at 39 °C under anaerobic  
402 conditions (Menke and Steingass, 1987). Each bottle contained 0.5 g alfalfa and 50 mL  
403 buffered rumen fluid. Chemicals were first dissolved in DMSO and then directly added  
404 into the bottles before the inoculation with the final DMSO concentration less than 0.1%.  
405 Bottles were sealed with rubber stoppers and aluminum caps and incubated at 39 °C for  
406 24 h. Each set of experimental tests had four replicates. Gas production was measured  
407 using a pressure transducer and a calibrated syringe (Theodorou et al., 1994). Following  
408 the gas measurement, methane and hydrogen production was determined immediately  
409 with a GC-TCD instrument (Agilent 7890B, Agilent, California, USA) according to the  
410 method described by Jin et al. (Jin et al., 2017).

411

#### 412 **Determination of effects of neonicotinoids on rice field soils**

413 Soil from the plow layer (0-20cm) was collected from a rice field in Jurong (China) in  
414 December, 2017. Soil was dried, sieved (2-mm mesh size), mixed and stored at room  
415 temperature. In a 25-mL glass vial, 2 g of dried soil was placed and flushed with N<sub>2</sub> for 20  
416 min to create an anaerobic environment. The insecticide was first dissolved in DMSO and  
417 applied to the soil in vials at a final concentration of 500 mg/kg soil. Four to five replicates  
418 were conducted in each experiment. The sample bottles were incubated in the dark at 30°C  
419 for 7 days (Zou et al., 2004). To determine CH<sub>4</sub> emissions, each incubation vial was  
420 ventilated by flushing the headspace with N<sub>2</sub> for 20 min and then sealed to accumulate  
421 CH<sub>4</sub>. After subsequent anaerobic incubation of 6-8 h, gas samples were obtained from the

422 headspace of incubation vials using miniaturized gas samples to determine CH<sub>4</sub> emission  
423 rates. CH<sub>4</sub> concentrations were measured within 24h using a gas chromatograph (Agilent  
424 7890A) coupled with thermal conductivity detector and flame ionization detector. The  
425 oven was operated at 55 °C, the FID at 200 °C (Zou et al., 2004).

426

#### 427 **Analysis of microbial community diversity**

428 The foreguts, midguts, and hindguts of 40 *P. americana* individuals treated with CYC at  
429 LC<sub>20</sub> (calculated from the toxicity bioassay results, Table S1) or untreated control (CK)  
430 were grouped into one sample, respectively. Three independent samples for each treatment  
431 and control were prepared. Total microbial DNA was isolated using the FastDNA<sup>®</sup> SPIN  
432 Kit (MP Biomedicals, USA) according to the manufacturer's protocol. The quantity and  
433 quality of the DNA were checked, and DNA was then stored at -80 °C until use.

434 The community diversity was determined via sequencing 16S rRNA amplified with  
435 different primer pairs. (1) For bacteria, 338F (5'-ACTCCTACGGGAGGCAGCAG-3')  
436 and 806R (5'-GGACTACHVGGGTWTCTAAT-3') were used (Hamady et al., 2008). (2)  
437 For archaea, 524F-10-ext (5'-TGYCAGCCGCCGCGGTAA-3') and 958R-mod  
438 (5'-YCCGGCGTTGAVTCCAATT-3') were used (Pires et al., 2012). (3) For  
439 methanogens, MLfF (5'-GGTGGTGTMGGATTCACACARTAYGCWACAGC-3') and  
440 MLrR (5'-TTCATTGCRTAGTTWGGRTAGTT-3') were used (Luton et al., 2002).  
441 Purified amplicons were pooled in equimolar and paired-end sequenced (2 × 300) on an  
442 Illumina MiSeq platform (Illumina, San Diego, USA) according to the standard protocols  
443 by Majorbio Bio-Pharm Technology Co. Ltd. (Shanghai, China).

444 Sequence reads were assigned to samples by their nucleotide barcodes, merged  
445 according to their overlap by FLASH (v1.2.7, <https://sourceforge.net/projects/flashpage/>),  
446 and quality filtered (>220 bp with less than 3% low-quality bases) by Trimmomatic-0.30  
447 (<http://www.usadellab.org/cms/index.php?page=trimmomatic>). Operational taxonomic  
448 units (OTUs) were clustered with 97% similarity cutoff using UPARSE (version 7.1,  
449 <http://drive5.com/uparse/>) with a novel ‘greedy’ algorithm that performs chimera filtering  
450 and OTU clustering simultaneously. The taxonomy of each 16S rRNA gene sequence was  
451 analyzed by RDP Classifier algorithm (<http://rdp.cme.msu.edu/>) against the Silva  
452 (SSU123) 16S rRNA database using confidence threshold of 70%. LEfSe (Linear  
453 discriminant analysis effect size) analysis was performed by Galaxy modules of  
454 Huttenhower lab (<https://huttenhower.sph.harvard.edu/galaxy/>) with threshold LDA score  
455 of 4.0.

456

#### 457 **Determination of *mcrA* levels by quantitative real-time PCR**

458 The *mcrA* was quantitated by SYBR Green I-based qPCR method using the primer pairs,  
459 mlas (GGTGGTGTMGDDTTCACMCARTA) and mcrA-rev  
460 (CGTTCATBGCGTAGTTVGGRTAGT) (Steinberg and Regan, 2008). A 20  $\mu\text{L}$  reaction  
461 contained 10  $\mu\text{L}$  SYBR<sup>®</sup>Premix Ex Taq<sup>™</sup> (Takara, China), 1  $\mu\text{L}$  template DNA (5-10  
462 ng), 0.4  $\mu\text{L}$  (10  $\mu\text{M}$ ) of each primer, 0.4  $\mu\text{L}$  of BSA (0.8  $\mu\text{g uL}^{-1}$  at the final  
463 concentration), 0.4  $\mu\text{L}$  of ROX reference dye (50 $\times$ ) and 7.4  $\mu\text{L}$  of sterile distilled water. A  
464 serials of known copy numbers of linearized plasmid DNA with the *mcrA* inserted from  
465 pure clones was used as standards for the quantitation. The thermal cycling was  
466 performed as following: 95  $^{\circ}\text{C}$  for 2 min, followed by 40 cycles of 95  $^{\circ}\text{C}$  for 5 s, 55  $^{\circ}\text{C}$

467 for 30 s, and 72 °C for 30 s. At least three biological repeats were prepared for each insect  
468 species, and three technical replicates were conducted for each qPCR reaction.

469

#### 470 **Statistics**

471 All data were analyzed with Data Processing System (DPS) software v9.50. The  
472 significance of differences was determined by one-way analysis of variance (ANOVA)  
473 and the significance level was set at 0.05 level.

474

475 **Data and materials availability:** The raw reads were deposited into the NCBI Sequence  
476 Read Archive (SRA) database (Accession Number: PRJNA524105).

#### 477 **Acknowledgements**

478 We would like to thank Mrs Yan Lin (Nanjing Termite Control Institute, Nanjing, China)  
479 for the provision of *Coptotermes chaohuensis*. We would like to thank Professor Neil S.  
480 Millar (University College London, Gower Street, London, United Kingdom) for his help  
481 in improving the language. The work is supported by National Natural Science  
482 Foundation of China (grant number 31830075, 31772185 and 31701823).

483

484 **Competing interests:** Authors declare no competing interests.

485

#### 486 **References**

487 Baffert C, Kpebe A, Avilan L, Brugna M. 2019. Hydrogenases and H<sub>2</sub> metabolism in  
488 sulfate-reducing bacteria of the *Desulfovibrio* genus In: Poole RK, editor.  
489 Advances in Microbial Physiology, Vol 74. pp. 143–189.

- 490 doi:10.1016/bs.ampbs.2019.03.001
- 491 Banwo K, Sanni A, Tan H. 2013. Functional Properties of *Pediococcus* Species Isolated
- 492 from Traditional Fermented Cereal Gruel and Milk in Nigeria. *Food Biotechnol*
- 493 **27**:14–38. doi:10.1080/08905436.2012.755626
- 494 Bass C, Denholm I, Williamson MS, Nauen R. 2015. The global status of insect
- 495 resistance to neonicotinoid insecticides. *Pestic Biochem Physiol* **121**:78–87.
- 496 doi:10.1016/j.pestbp.2015.04.004
- 497 Bauer E, Lampert N, Mikaelyan A, Köhler T, Maekawa K, Brune A. 2015.
- 498 Physicochemical conditions, metabolites and community structure of the bacterial
- 499 microbiota in the gut of wood-feeding cockroaches (Blaberidae: Panesthiinae).
- 500 *FEMS Microbiol Ecol* **91**:1–14. doi:10.1093/femsec/fiu028
- 501 Brune A. 2010. Methanogenesis in the Digestive Tracts of Insects In: Timmis KN, editor.
- 502 Handbook of Hydrocarbon and Lipid Microbiology. Berlin, Heidelberg: Springer
- 503 Berlin Heidelberg. pp. 707–728. doi:10.1007/978-3-540-77587-4\_56
- 504 Casida JE. 2018. Neonicotinoids and Other Insect Nicotinic Receptor Competitive
- 505 Modulators: Progress and Prospects In: Berenbaum MR, editor. Annual Review of
- 506 Entomology, Vol 63. Palo Alto: Annual Reviews. pp. 125–144.
- 507 doi:10.1146/annurev-ento-020117-043042
- 508 Friedrich MW. 2005. Methyl-Coenzyme M Reductase Genes: Unique Functional Markers
- 509 for Methanogenic and Anaerobic Methane-Oxidizing Archaea Methods in
- 510 Enzymology. Academic Press. pp. 428–442.
- 511 Godfray HCJ, Blacquiere T, Field LM, Hails RS, Potts SG, Raine NE, Vanbergen AJ,
- 512 McLean AR. 2015. A restatement of recent advances in the natural science
- 513 evidence base concerning neonicotinoid insecticides and insect pollinators. *Proc*
- 514 *R Soc B-Biol Sci* **282**:20151821. doi:10.1098/rspb.2015.1821
- 515 Goulson D, Kleijn D. 2013. REVIEW: An overview of the environmental risks posed by
- 516 neonicotinoid insecticides. *Journal of Applied Ecology*.
- 517 doi:10.1111/1365-2664.12111
- 518 Hackstein JH, Stumm CK. 1994. Methane production in terrestrial arthropods. *PNAS*
- 519 **91**:5441–5445. doi:10.1073/pnas.91.12.5441
- 520 Hackstein JHP, van Alen TA. 2018. Methanogens in the Gastrointestinal Tract of Animals
- 521 In: Hackstein JHP, editor. (Endo)Symbiotic Methanogenic Archaea, Microbiology
- 522 Monographs. Cham: Springer International Publishing. pp. 121–152.
- 523 doi:10.1007/978-3-319-98836-8\_8
- 524 Hamady M, Walker JJ, Harris JK, Gold NJ, Knight R. 2008. Error-correcting barcoded
- 525 primers for pyrosequencing hundreds of samples in multiplex. *Nat Methods* **5**:235.
- 526 doi:10.1038/nmeth.1184
- 527 <https://www.nature.com/articles/nmeth.1184#supplementary-information>
- 528 Henry M, Beguin M, Requier F, Rollin O, Odoux JF, Aupinel P, Aptel J, Tchamitchian S,
- 529 Decourtye A. 2012. A Common Pesticide Decreases Foraging Success and
- 530 Survival in Honey Bees. *Science* **336**:348–350. doi:10.1126/science.1215039
- 531 Jin W, Meng Z, Wang J, Cheng Y, Zhu W. 2017. Effect of Nitrooxy Compounds with
- 532 Different Molecular Structures on the Rumen Methanogenesis, Metabolic Profile,
- 533 and Methanogenic Community. *Curr Microbiol* **74**:891–898.
- 534 doi:10.1007/s00284-017-1261-7
- 535 Kroeninger L, Steiniger F, Berger S, Kraus S, Welte CU, Deppenmeier U. 2019. Energy



- 536 conservation in the gut microbe *Methanomassiliicoccus luminyensis* is based on  
537 membrane-bound ferredoxin oxidation coupled to heterodisulfide reduction.  
538 *FEBS J* **286**:3831–3843. doi:10.1111/febs.14948
- 539 Lemke T, Alen T van, Hackstein JHP, Brune A. 2001. Cross-Epithelial Hydrogen Transfer  
540 from the Midgut Compartment Drives Methanogenesis in the Hindgut of  
541 Cockroaches. *Appl Environ Microbiol* **67**:4657–4661.  
542 doi:10.1128/AEM.67.10.4657-4661.2001
- 543 Luton PE, Wayne JM, Sharp RJ, Riley PW. 2002. The *mcrA* gene as an alternative to 16S  
544 rRNA in the phylogenetic analysis of methanogen populations in landfill.  
545 *Microbiology-(UK)* **148**:3521–3530. doi:10.1099/00221287-148-11-3521
- 546 Martínez-Fernández G, Abecia L, Arco A, Cantalapiedra-Hijar G, Martín-García AI,  
547 Molina-Alcaide E, Kindermann M, Duval S, Yáñez-Ruiz DR. 2014. Effects of  
548 ethyl-3-nitrooxy propionate and 3-nitrooxypropanol on ruminal fermentation,  
549 microbial abundance, and methane emissions in sheep. *J Dairy Sci* **97**:3790–3799.
- 550 Menke KH (Hohenheim U, Steingass H. 1987. Estimation of the energetic feeding value  
551 from gas production with rumen fluid in vitro and from chemical analysis, 2:  
552 Regression equations. *Uebersichten zur Tierernaehrung (Germany, FR)*.
- 553 Pandey A, Srivastava S, Rai P, Duke M. 2019. Cheese whey to biohydrogen and useful  
554 organic acids: A non-pathogenic microbial treatment by *L. acidophilus*. *Sci Rep*  
555 **9**:1–9. doi:10.1038/s41598-019-42752-3
- 556 Peter J, Ralf N, Michael S, Alfred E. 2010. Overview of the status and global strategy for  
557 neonicotinoids. *J Agric Food Chem* **59**:2897–908. doi:10.1021/jf101303g
- 558 Pires AC, Cleary DF, Almeida A, Cunha Â, Dealtry S, Mendonça-Hagler LC, Smalla K,  
559 Gomes NC. 2012. Denaturing gradient gel electrophoresis and barcoded  
560 pyrosequencing reveal unprecedented archaeal diversity in mangrove sediment  
561 and rhizosphere samples. *Appl Environ Microbiol* **78**:5520–5528.
- 562 Sanderson MG. 1996. Biomass of termites and their emissions of methane and carbon  
563 dioxide: A global database. *Glob Biogeochem Cycle* **10**:543–557.  
564 doi:10.1029/96GB01893
- 565 Schmitt-Wagner D, Brune A. 1999. Hydrogen profiles and localization of methanogenic  
566 activities in the highly compartmentalized hindgut of soil-feeding higher termites  
567 (*Cubitermes* spp.). *Appl Environ Microbiol* **65**:4490–4496.
- 568 Sparks TC, Nauen R. 2015. IRAC: Mode of action classification and insecticide  
569 resistance management. *Pest Biochem Physiol* **121**:122–128.  
570 doi:10.1016/j.pestbp.2014.11.014
- 571 Stanley DA, Russell AL, Morrison SJ, Rogers C, Raine NE. 2016. Investigating the  
572 impacts of field-realistic exposure to a neonicotinoid pesticide on bumblebee  
573 foraging, homing ability and colony growth. *J Appl Ecol* **53**:1440–1449.  
574 doi:10.1111/1365-2664.12689
- 575 Steinberg LM, Regan JM. 2008. Phylogenetic Comparison of the Methanogenic  
576 Communities from an Acidic, Oligotrophic Fen and an Anaerobic Digester  
577 Treating Municipal Wastewater Sludge. *Appl Environ Microbiol* **74**:6663–6671.  
578 doi:10.1128/AEM.00553-08
- 579 Sugimoto A, Inoue T, Tayasu I, Miller L, Takeichi S, Abe T. 1998. Methane and hydrogen  
580 production in a termite-symbiont system. *Ecol Res* **13**:241–257.  
581 doi:10.1046/j.1440-1703.1998.00262.x

- 582 Thauer RK, Kaster A-K, Seedorf H, Buckel W, Hedderich R. 2008. Methanogenic  
583 archaea: ecologically relevant differences in energy conservation. *Nat Rev*  
584 *Microbiol* **6**:579–591. doi:10.1038/nrmicro1931
- 585 Theodorou MK, Williams BA, Dhanoa MS, McAllan AB, France J. 1994. A simple gas  
586 production method using a pressure transducer to determine the fermentation  
587 kinetics of ruminant feeds. *Anim Feed Sci Technol* **48**:185–197.  
588 doi:[https://doi.org/10.1016/0377-8401\(94\)90171-6](https://doi.org/10.1016/0377-8401(94)90171-6)
- 589 Whitehorn PR, O’Connor S, Wackers FL, Goulson D. 2012. Neonicotinoid pesticide  
590 reduces bumble bee colony growth and queen production. *Science* **336**:351–2.  
591 doi:10.1126/science.1215025
- 592 Wilkins D, Lu X-Y, Shen Z, Chen J, Lee PKH. 2015. Pyrosequencing of mcrA and  
593 Archaeal 16S rRNA Genes Reveals Diversity and Substrate Preferences of  
594 Methanogen Communities in Anaerobic Digesters. *Appl Environ Microbiol*  
595 **81**:604–613. doi:10.1128/AEM.02566-14
- 596 Yvon-Durocher G, Allen AP, Bastviken D, Conrad R, Gudasz C, St-Pierre A, Thanh-Duc  
597 N, del Giorgio PA. 2014. Methane fluxes show consistent temperature  
598 dependence across microbial to ecosystem scales. *Nature* **507**:488–491.  
599 doi:10.1038/nature13164
- 600 Zhang Y, Xu X, Bao H, Shao X, Li Z, Liu Z. 2019. The binding properties of cycloxyprid  
601 on insect native nAChRs partially explain the low cross-resistance with  
602 imidacloprid in *Nilaparvata lugens*. *Pest Manag Sci* **75**:246–251.  
603 doi:doi:10.1002/ps.5108
- 604 Zou JW, Huang Y, Zong LG, Zheng XH, Wang YS. 2004. Carbon dioxide, methane, and  
605 nitrous oxide emissions from a rice-wheat rotation as affected by crop residue  
606 incorporation and temperature. *Adv Atmos Sci* **21**:691–698.
- 607 Baffert C, Kpebe A, Avilan L, Brugna M. 2019. Hydrogenases and H<sub>2</sub> metabolism in  
608 sulfate-reducing bacteria of the *Desulfovibrio* genus In: Poole RK, editor.  
609 *Advances in Microbial Physiology*, Vol 74. pp. 143–189.  
610 doi:10.1016/bs.ampbs.2019.03.001
- 611 Banwo K, Sanni A, Tan H. 2013. Functional Properties of *Pediococcus* Species Isolated  
612 from Traditional Fermented Cereal Gruel and Milk in Nigeria. *Food Biotechnol*  
613 **27**:14–38. doi:10.1080/08905436.2012.755626
- 614 Bass C, Denholm I, Williamson MS, Nauen R. 2015. The global status of insect  
615 resistance to neonicotinoid insecticides. *Pestic Biochem Physiol* **121**:78–87.  
616 doi:10.1016/j.pestbp.2015.04.004
- 617 Bauer E, Lampert N, Mikaelyan A, Köhler T, Maekawa K, Brune A. 2015.  
618 Physicochemical conditions, metabolites and community structure of the bacterial  
619 microbiota in the gut of wood-feeding cockroaches (Blaberidae: Panesthiinae).  
620 *FEMS Microbiol Ecol* **91**:1–14. doi:10.1093/femsec/fiu028
- 621 Brune A. 2010. Methanogenesis in the Digestive Tracts of Insects In: Timmis KN, editor.  
622 *Handbook of Hydrocarbon and Lipid Microbiology*. Berlin, Heidelberg: Springer  
623 Berlin Heidelberg. pp. 707–728. doi:10.1007/978-3-540-77587-4\_56
- 624 Casida JE. 2018. Neonicotinoids and Other Insect Nicotinic Receptor Competitive  
625 Modulators: Progress and Prospects In: Berenbaum MR, editor. *Annual Review of*  
626 *Entomology*, Vol 63. Palo Alto: Annual Reviews. pp. 125–144.  
627 doi:10.1146/annurev-ento-020117-043042

- 628 Friedrich MW. 2005. Methyl-Coenzyme M Reductase Genes: Unique Functional Markers  
629 for Methanogenic and Anaerobic Methane-Oxidizing Archaea. *Methods in*  
630 *Enzymology*. Academic Press. pp. 428–442.
- 631 Godfray HCJ, Blacquiere T, Field LM, Hails RS, Potts SG, Raine NE, Vanbergen AJ,  
632 McLean AR. 2015. A restatement of recent advances in the natural science  
633 evidence base concerning neonicotinoid insecticides and insect pollinators. *Proc*  
634 *R Soc B-Biol Sci* **282**:20151821. doi:10.1098/rspb.2015.1821
- 635 Goulson D, Kleijn D. 2013. REVIEW: An overview of the environmental risks posed by  
636 neonicotinoid insecticides. *Journal of Applied Ecology*.  
637 doi:10.1111/1365-2664.12111
- 638 Hackstein JH, Stumm CK. 1994. Methane production in terrestrial arthropods. *PNAS*  
639 **91**:5441–5445. doi:10.1073/pnas.91.12.5441
- 640 Hackstein JHP, van Alen TA. 2018. Methanogens in the Gastrointestinal Tract of Animals  
641 In: Hackstein JHP, editor. (Endo)Symbiotic Methanogenic Archaea, *Microbiology*  
642 *Monographs*. Cham: Springer International Publishing. pp. 121–152.  
643 doi:10.1007/978-3-319-98836-8\_8
- 644 Hamady M, Walker JJ, Harris JK, Gold NJ, Knight R. 2008. Error-correcting barcoded  
645 primers for pyrosequencing hundreds of samples in multiplex. *Nat Methods* **5**:235.  
646 doi:10.1038/nmeth.1184  
647 <https://www.nature.com/articles/nmeth.1184#supplementary-information>
- 648 Henry M, Beguin M, Requier F, Rollin O, Odoux JF, Aupinel P, Aptel J, Tchamitchian S,  
649 Decourtye A. 2012. A Common Pesticide Decreases Foraging Success and  
650 Survival in Honey Bees. *Science* **336**:348–350. doi:10.1126/science.1215039
- 651 Kroeninger L, Steiniger F, Berger S, Kraus S, Welte CU, Deppenmeier U. 2019. Energy  
652 conservation in the gut microbe *Methanomassiliicoccus luminyensis* is based on  
653 membrane-bound ferredoxin oxidation coupled to heterodisulfide reduction.  
654 *FEBS J* **286**:3831–3843. doi:10.1111/febs.14948
- 655 Lemke T, Alen T van, Hackstein JHP, Brune A. 2001. Cross-Epithelial Hydrogen Transfer  
656 from the Midgut Compartment Drives Methanogenesis in the Hindgut of  
657 Cockroaches. *Appl Environ Microbiol* **67**:4657–4661.  
658 doi:10.1128/AEM.67.10.4657-4661.2001
- 659 Luton PE, Wayne JM, Sharp RJ, Riley PW. 2002. The *mcrA* gene as an alternative to 16S  
660 rRNA in the phylogenetic analysis of methanogen populations in landfill.  
661 *Microbiology-(UK)* **148**:3521–3530. doi:10.1099/00221287-148-11-3521
- 662 Pandey A, Srivastava S, Rai P, Duke M. 2019. Cheese whey to biohydrogen and useful  
663 organic acids: A non-pathogenic microbial treatment by *L. acidophilus*. *Sci Rep*  
664 **9**:1–9. doi:10.1038/s41598-019-42752-3
- 665 Peter J, Ralf N, Michael S, Alfred E. 2010. Overview of the status and global strategy for  
666 neonicotinoids. *J Agric Food Chem* **59**:2897–908. doi:10.1021/jf101303g
- 667 Pires AC, Cleary DF, Almeida A, Cunha Â, Dealtry S, Mendonça-Hagler LC, Smalla K,  
668 Gomes NC. 2012. Denaturing gradient gel electrophoresis and barcoded  
669 pyrosequencing reveal unprecedented archaeal diversity in mangrove sediment  
670 and rhizosphere samples. *Appl Environ Microbiol* **78**:5520–5528.
- 671 Sanderson MG. 1996. Biomass of termites and their emissions of methane and carbon  
672 dioxide: A global database. *Glob Biogeochem Cycle* **10**:543–557.  
673 doi:10.1029/96GB01893

- 674 Schmitt-Wagner D, Brune A. 1999. Hydrogen profiles and localization of methanogenic  
675 activities in the highly compartmentalized hindgut of soil-feeding higher termites  
676 (*Cubitermes* spp.). *Appl Environ Microbiol* **65**:4490–4496.
- 677 Sparks TC, Nauen R. 2015. IRAC: Mode of action classification and insecticide  
678 resistance management. *Pest Biochem Physiol* **121**:122–128.  
679 doi:10.1016/j.pestbp.2014.11.014
- 680 Stanley DA, Russell AL, Morrison SJ, Rogers C, Raine NE. 2016. Investigating the  
681 impacts of field-realistic exposure to a neonicotinoid pesticide on bumblebee  
682 foraging, homing ability and colony growth. *J Appl Ecol* **53**:1440–1449.  
683 doi:10.1111/1365-2664.12689
- 684 Steinberg LM, Regan JM. 2008. Phylogenetic Comparison of the Methanogenic  
685 Communities from an Acidic, Oligotrophic Fen and an Anaerobic Digester  
686 Treating Municipal Wastewater Sludge. *Appl Environ Microbiol* **74**:6663–6671.  
687 doi:10.1128/AEM.00553-08
- 688 Sugimoto A, Inoue T, Tayasu I, Miller L, Takeichi S, Abe T. 1998. Methane and hydrogen  
689 production in a termite-symbiont system. *Ecol Res* **13**:241–257.  
690 doi:10.1046/j.1440-1703.1998.00262.x
- 691 Thauer RK, Kaster A-K, Seedorf H, Buckel W, Hedderich R. 2008. Methanogenic  
692 archaea: ecologically relevant differences in energy conservation. *Nat Rev*  
693 *Microbiol* **6**:579–591. doi:10.1038/nrmicro1931
- 694 Whitehorn PR, O'Connor S, Wackers FL, Goulson D. 2012. Neonicotinoid pesticide  
695 reduces bumble bee colony growth and queen production. *Science* **336**:351–2.  
696 doi:10.1126/science.1215025
- 697 Wilkins D, Lu X-Y, Shen Z, Chen J, Lee PKH. 2015. Pyrosequencing of *mcrA* and  
698 Archaeal 16S rRNA Genes Reveals Diversity and Substrate Preferences of  
699 Methanogen Communities in Anaerobic Digesters. *Appl Environ Microbiol*  
700 **81**:604–613. doi:10.1128/AEM.02566-14
- 701 Yvon-Durocher G, Allen AP, Bastviken D, Conrad R, Gudasz C, St-Pierre A, Thanh-Duc  
702 N, del Giorgio PA. 2014. Methane fluxes show consistent temperature  
703 dependence across microbial to ecosystem scales. *Nature* **507**:488–491.  
704 doi:10.1038/nature13164
- 705 Zhang Y, Xu X, Bao H, Shao X, Li Z, Liu Z. 2019. The binding properties of cycloxyprid  
706 on insect native nAChRs partially explain the low cross-resistance with  
707 imidacloprid in *Nilaparvata lugens*. *Pest Manag Sci* **75**:246–251.  
708 doi:doi:10.1002/ps.5108
